# Supplementary material for: Numb provides a fail-safe mechanism for intestinal stem cell self-renewal in adult Drosophila midgut
Source: eLife. 2025 Apr 9;14:RP104723. doi: 10.7554/eLife.104723 (PMC11981606; doi:10.7554/eLife.104723)
Supplement: Figure 1—source data 1. [file elife-104723-fig1-data1.xlsx]

## Sheet: Figure 1F
	esg-GFP+	Su(H)-lacZ+
control	317	161
put RNAi	210	203
Dl RNAi	261	0
put RNAi + Dl RNAi	153	143
