# Supplementary material for: Numb provides a fail-safe mechanism for intestinal stem cell self-renewal in adult Drosophila midgut
Source: eLife. 2025 Apr 9;14:RP104723. doi: 10.7554/eLife.104723 (PMC11981606; doi:10.7554/eLife.104723)
Supplement: Figure 2—source data 1. [file elife-104723-fig2-data1.xlsx]

## Sheet: Figure 2E-G
mCherry RNAi				mad RNAi				numb RNAi				mad RNAi + numb RNAi
esg-GFP+	Dl-lacZ+ mβCD2-	mβCD2+		esg-GFP+	Dl-lacZ+ mβCD2-	mβCD2+		esg-GFP+	Dl-lacZ+ mβCD2-	mβCD2+		esg-GFP+	Dl-lacZ+ mβCD2-	mβCD2+
17	10	10		23	6	13		18	6	6		8	1	8
15	7	9		19	6	11		14	7	7		13	4	7
18	7	8		23	9	15		18	10	12		15	5	9
17	9	15		19	8	11		20	12	8		12	1	5
20	10	12		26	15	14		21	13	4		10	1	8
22	10	11		25	19	15		17	8	10		11	4	10
23	13	11		17	11	14		16	10	6		11	3	10
20	11	11		18	10	16		19	11	8		13	2	12
19	12	10		20	11	10		21	12	9		12	1	12
19	8	9		22	11	11		14	7	6		14	1	14
18	8	9		20	10	10		22	9	10		16	0	16
16	6	9		22	10	12		17	7	6		14	1	13
11	2	7		19	7	12		22	10	15		14	0	10
17	7	8		15	7	9		20	14	15		12	0	12
16	8	11		15	8	12		20	11	13		16	0	16
18	6	10		24	8	16		13	5	8		12	0	12
18	6	12		17	6	12		16	8	10		11	0	10
22	9	15		20	8	16		16	7	11		13	0	14
20	8	12		22	10	14		16	8	11		11	0	17
20	11	9		19	8	11		12	6	9		13	0	14
16	6	12		20	10	10		16	9	9		13	0	14
20	6	12		19	6	12		14	7	7		20	1	18
20	7	13		20	10	12		14	6	8		13	1	14
18	7	13		20	10	10		15	7	9		14	0	12
13	6	8						18	5	9		14	0	12
18	6	9						21	6	12		12	0	12
18	7	9						18	5	10		12	0	12
16	6	8										16	0	16
14	6	12										18	0	18
16	6	13										18	0	18
17	7	11										12	0	12
21	10	12										12	1	9
23	10	15										14	0	14
18	9	14										7	0	7
20	8	11										10	0	10
21	7	12										8	0	8
