# Supplementary material for: Numb provides a fail-safe mechanism for intestinal stem cell self-renewal in adult Drosophila midgut
Source: eLife. 2025 Apr 9;14:RP104723. doi: 10.7554/eLife.104723 (PMC11981606; doi:10.7554/eLife.104723)
Supplement: Figure 3—source data 1. [file elife-104723-fig3-data1.xlsx]

## Sheet: Figure 3K
	2 cells	3~5 cells	6~8 cells	>9 cells
Control	14	72	147	158
mad1-2	5	25	68	201
numb4	17	65	101	118
mad1-2, numb4	22	90	98	42

## Sheet: Figure 3L
	ISC+ clone	ISC- clone
Control	357	34
mad1-2	293	11
numb4	264	51
mad1-2, numb4	159	93
