# Supplementary material for: Numb provides a fail-safe mechanism for intestinal stem cell self-renewal in adult Drosophila midgut
Source: eLife. 2025 Apr 9;14:RP104723. doi: 10.7554/eLife.104723 (PMC11981606; doi:10.7554/eLife.104723)
Supplement: Figure 4—source data 1. [file elife-104723-fig4-data1.xlsx]

## Sheet: Figure 4P
	ISC/EB	ISC/ISC	EB/EB
Control	82	18	19
mad RNAi	48	22	3
numb RNAi	86	24	17
mad RNAi + _x000D_numb RNAi	28	6	20
