# Supplementary material for: Numb provides a fail-safe mechanism for intestinal stem cell self-renewal in adult Drosophila midgut
Source: eLife. 2025 Apr 9;14:RP104723. doi: 10.7554/eLife.104723 (PMC11981606; doi:10.7554/eLife.104723)
Supplement: Figure 5—source data 1. [file elife-104723-fig5-data1.xlsx]

## Sheet: Figure 5D
	2 cells	3~5 cells	6~8 cells	>8 cells
Control	4	15	28	16
numb4	9	34	50	15
numb15	8	20	27	15

## Sheet: Figure 5E
	ISC+ clone	ISC- clone
Control	57	8
numb4	81	27
numb15	62	30
