# Supplementary material for: Numb provides a fail-safe mechanism for intestinal stem cell self-renewal in adult Drosophila midgut
Source: eLife. 2025 Apr 9;14:RP104723. doi: 10.7554/eLife.104723 (PMC11981606; doi:10.7554/eLife.104723)
Supplement: Figure 6—source data 1. [file elife-104723-fig6-data1.xlsx]

## Sheet: Figure 6K
		2 cells	3~5 cells	6~8 cells	>8 cells
Control	Suc	9	42	76	37
	Bleo	10	41	81	28
	DSS	15	37	61	49
numb4	Suc	16	47	90	64
	Bleo	16	64	52	18
	DSS	25	53	71	28
numb15	Suc	17	66	82	54
	Bleo	28	71	87	29
	DSS	11	34	66	31

## Sheet: Figure 6J
		ISC+ clone	ISC- clone
Control	Suc	145	20
	Bleo	141	19
	DSS	150	17
numb4	Suc	171	45
	Bleo	85	64
	DSS	126	39
numb15	Suc	167	52
	Bleo	117	96
	DSS	112	29
